# Supplementary material
Source: publisher site journal article supplement (https://www.spandidos-publications.com/2060/downloadSupplementary)

Figure S1. Detection of protein levels of MTA2 by immunoblotting following propofol treatment. A549 cells were treated with propofol for 72 h and protein expression levels of MTA2 and MBD3 were detected by immunoblotting. MTA2, metastasis-associated 1 family member 2; MBD3, methyl-CpG binding domain protein 3; IB, immunoblot.

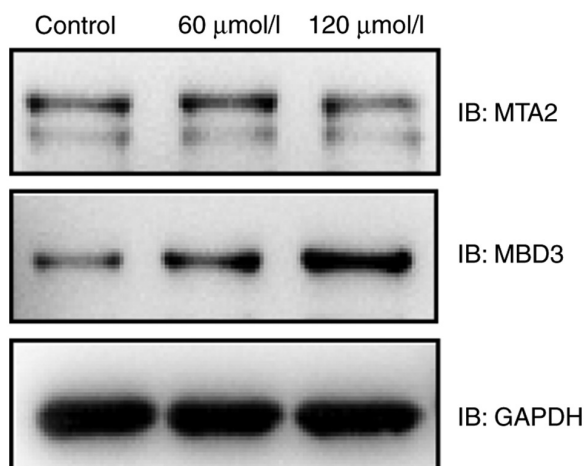

Supplement: Supplementary file 1 [file downloadSupplementary]
